# Supplementary material
Source: Springer Nature journal article supplement (https://www.springermedizin.de/resource/supplementary/12885_2013_4162_MOESM2_ESM.pdf/9465598)

|      | 5 years (%) | 7 years (%) |
|------|-------------|-------------|
| RP   | 2.3         | 3.5         |
| IMRT | 6.8         | 8           |

**M  
O  
C**

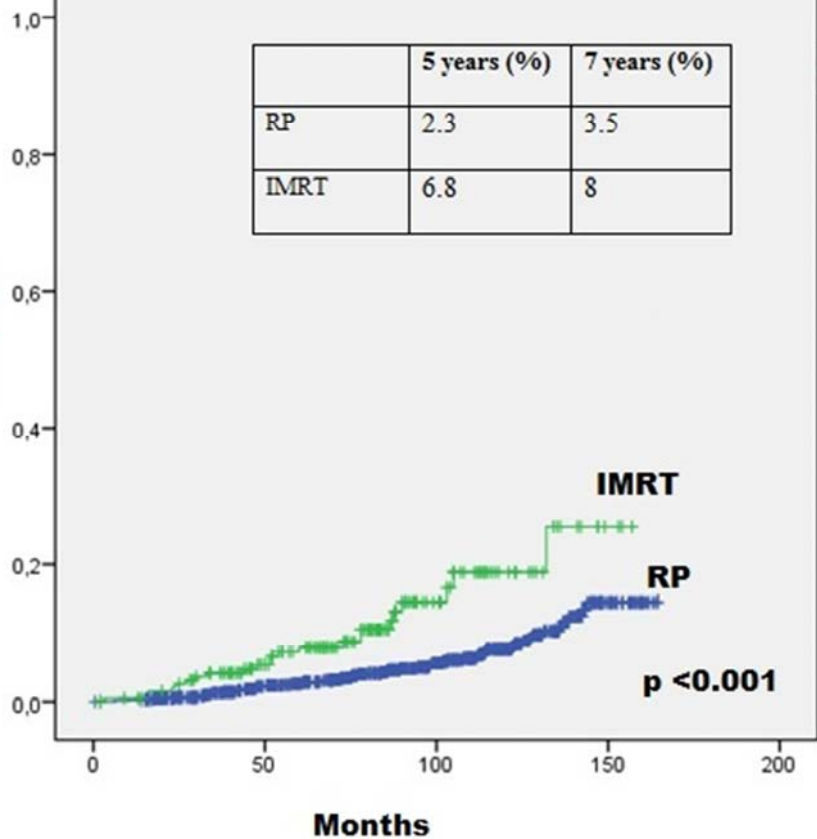

Supplement: MOESM2 [file 9465598]
